# Supplementary material
Source: publisher site journal article supplement (https://www.spandidos-publications.com/3549/downloadSupplementary)

Figure S1. Cholinergic agonists, acetylcholine and nicotine, do not influence cell proliferation. (A and D) A172, (B and E) U87 or (C and F) G28 cells were incubated with different concentrations of nicotine (A-C) or acetylcholine (D-F) for 24 h (light grey) or 48 h (dark grey). An MTT assay was performed and individual values were normalized to the water-treated sample. Data are presented as the mean  $\pm$  SEM (n=4). OD, optical density.

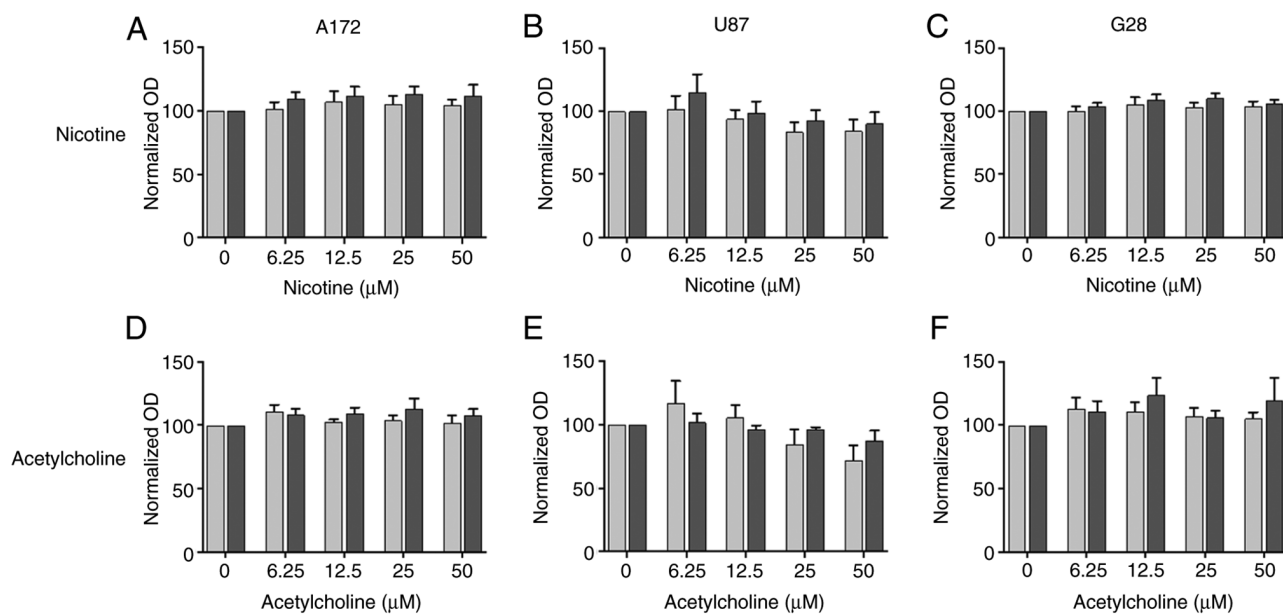

Supplement: Supplementary file 1 [file downloadSupplementary]
